# Supplementary material
Source: MDPI journal article supplement (https://www.mdpi.com/2571-550X/5/1/1)
Supplement: s1 [file s1]

## Supplementary Information

### Stratigraphy

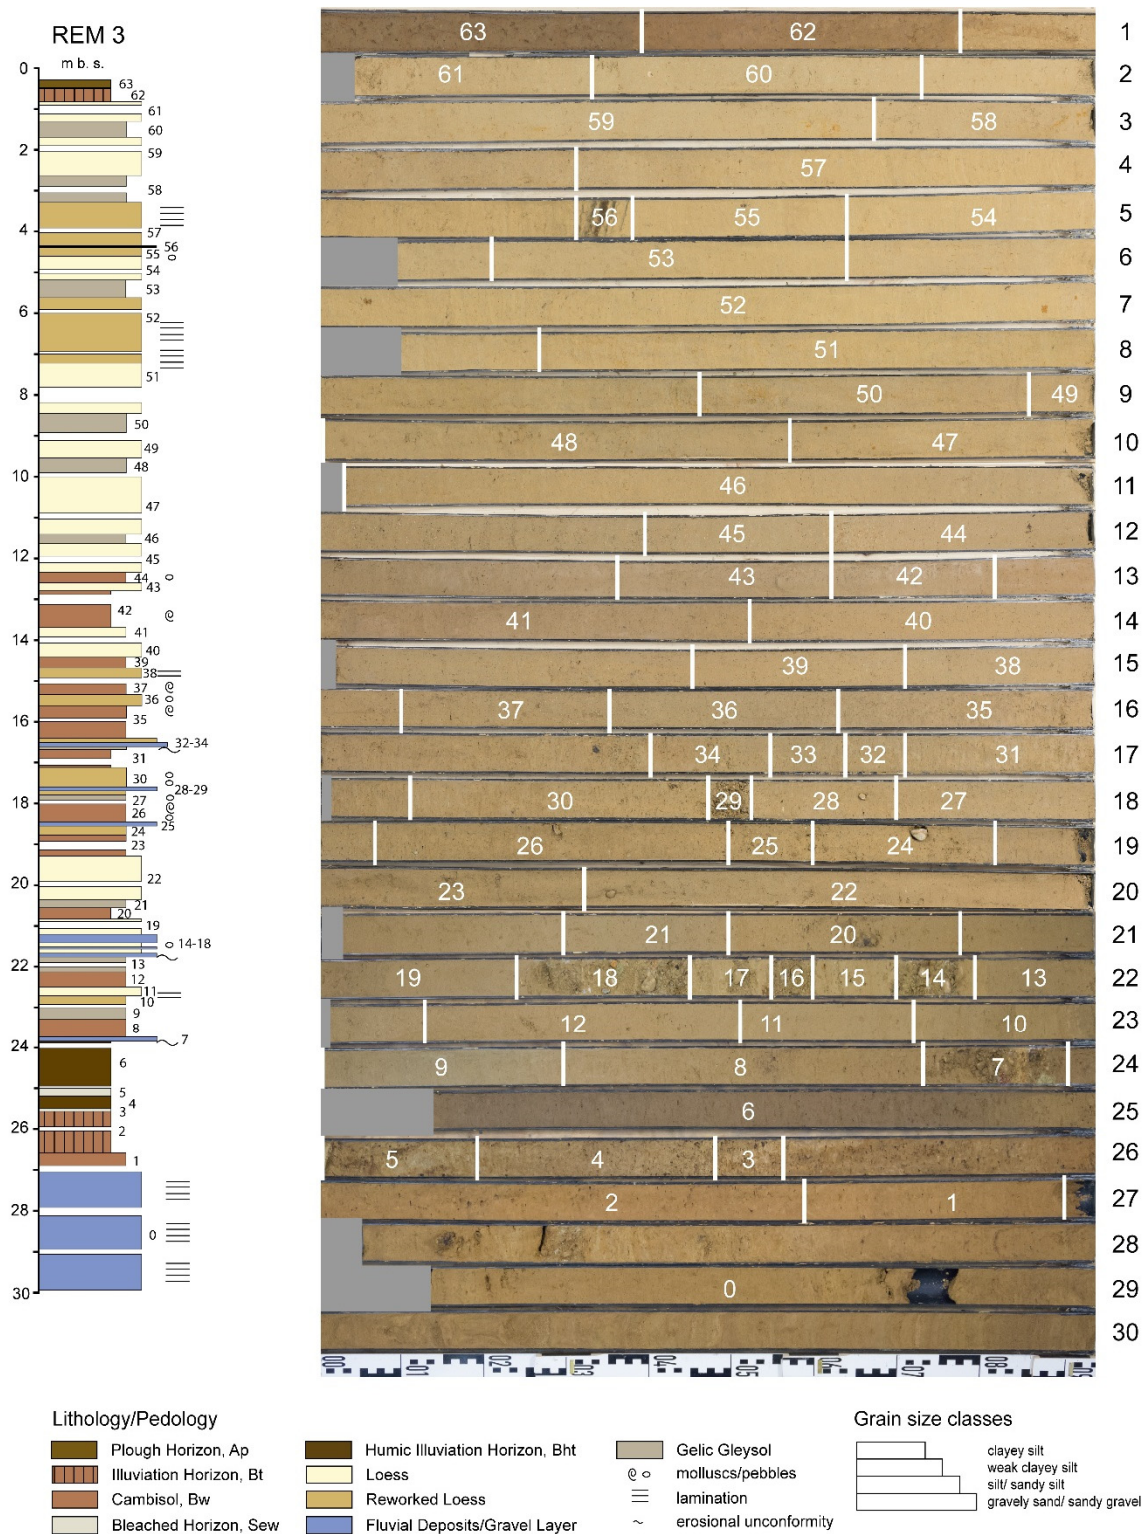

**Figure S1.** Photograph of core REM3A, collected adjacent REM3B, and stratigraphic log as documented in [54].

## Luminescence Measurements

### Equivalent dose measurements, profile RP1

**Table S1.** Overview of luminescence samples collected from the profile RP1. The number of aliquots measured for each size and mineral fraction, determined by availability, is provided in the respective columns. Equivalent dose is given as the mean of the accepted aliquots.

| Sample   | Depth (m)   | Approx. D <sub>e</sub> (Gy) | Stratigraphic Description | Luminescence Sensitivity Measurements (Number of Aliquots) |            |             |
|----------|-------------|-----------------------------|---------------------------|------------------------------------------------------------|------------|-------------|
|          |             |                             |                           | Quartz                                                     |            | Polymineral |
|          |             |                             |                           | 63-100 µm                                                  | 100-200 µm | 4-11 µm     |
| MAL10349 | 3.50 ± 0.05 | 80                          | Primary loess (MIS2)      | 21                                                         | 0          | 18          |
| MAL10348 | 4.25 ± 0.05 | 80                          | Primary loess (MIS3)      | 24                                                         | 18         | 18          |
| MAL10347 | 4.95 ± 0.05 | 80                          | Weak paleosol (MIS3)      | 24                                                         | 14         | 18          |
| MAL10346 | 6.35 ± 0.05 | 96                          | Primary loess (MIS3)      | 24                                                         | 24         | 18          |

**Table S2.** Summary of equivalent dose values for the different mineral and grain-size fractions measured for profile RP1 (see [53] for more details). The number of aliquots measured for each sample is given as n.

| Sample   | Depth from Surface (m) | Quartz D <sub>e</sub> (Gy) |    |            |    | Polymineral D <sub>e</sub> (Gy) |    |
|----------|------------------------|----------------------------|----|------------|----|---------------------------------|----|
|          |                        | 100-200 µm                 | n  | 63-100 µm  | n  | 4-11 µm                         | n  |
| MAL10349 | 3.50 ± 0.05            | -                          | -  | 59.3 ± 2.4 | 21 | 77.7 ± 1.1                      | 17 |
| MAL10348 | 4.25 ± 0.05            | 72.8 ± 3.3                 | 9  | 70.2 ± 2.7 | 18 | 80.4 ± 1.8                      | 17 |
| MAL10347 | 4.95 ± 0.05            | 91.7 ± 5.6                 | 4  | 79.3 ± 4.4 | 20 | 81.4 ± 1.4                      | 13 |
| MAL10346 | 6.35 ± 0.05            | 81.2 ± 6.0                 | 18 | 86.0 ± 3.5 | 21 | 100 ± 1.3                       | 18 |

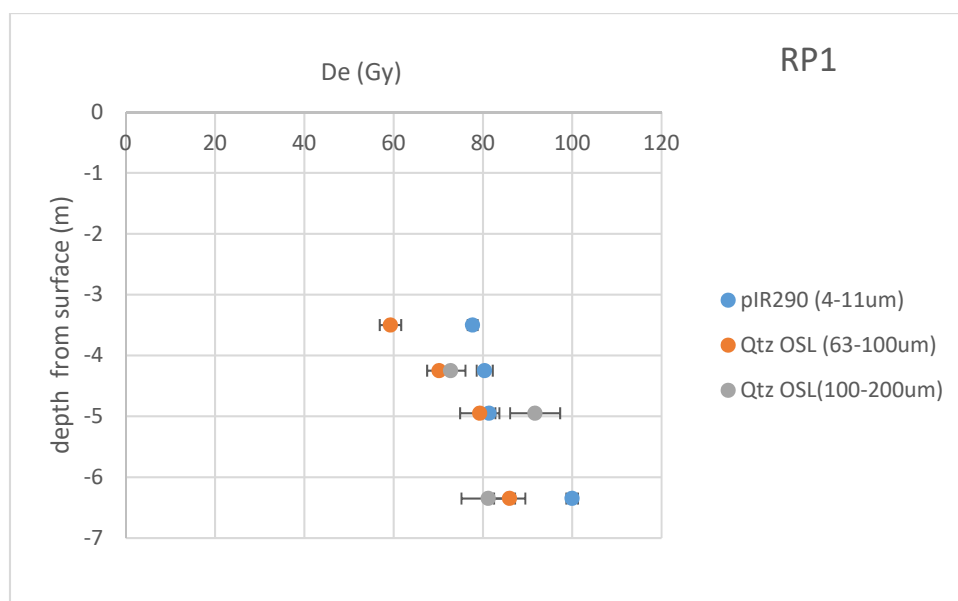

**Figure S2.** Equivalent dose vs. depth for the different mineral and grain-size fractions measured for profile RP1. Uncertainties shown are for  $1\sigma$ .

#### Equivalent dose measurements, REM3B core

**Table S3.** Overview of samples from core REM3B measured for this study with respect to measurement protocol, mineral and grain-size fraction. From a total of 102 samples collected from the core, 83 were measured for unprocessed IRSL<sub>50</sub>, 10 for 63-90 µm polymineral pIR<sub>200</sub>IR<sub>290</sub>, 8 for 63-90 µm K-feldspar pIR<sub>50</sub>IR<sub>290</sub>, 5 for 63-90 µm quartz OSL and 10 for 4-11 µm quartz OSL.

| Sample | Depth (m)    | IRSL <sub>50</sub><br>(Bulk) | pIR <sub>50</sub> IR <sub>290</sub><br>(63-90 µm,<br>Polymineral) | pIR <sub>200</sub> IR <sub>290</sub> (63-90<br>µm, K-Feldspar) | OSL (63-90<br>µm, Quartz) | OSL (4-11 µm,<br>Quartz) |
|--------|--------------|------------------------------|-------------------------------------------------------------------|----------------------------------------------------------------|---------------------------|--------------------------|
| A0164  | 29.80 ± 0.05 |                              |                                                                   |                                                                |                           | X                        |
| A0166  | 28.85 ± 0.05 |                              |                                                                   |                                                                |                           | X                        |
| A0167  | 28.45 ± 0.05 |                              |                                                                   |                                                                |                           | X                        |
| A0168  | 27.75 ± 0.05 |                              |                                                                   |                                                                |                           | X                        |
| A0171  | 26.35 ± 0.05 | X                            |                                                                   |                                                                |                           | X                        |
| A0172  | 25.30 ± 0.05 |                              |                                                                   |                                                                |                           | X                        |
| A0174  | 24.25 ± 0.05 | X                            |                                                                   |                                                                |                           | X                        |
| A0175  | 23.65 ± 0.05 | X                            |                                                                   |                                                                |                           | X                        |
| A0176  | 23.45 ± 0.05 | X                            |                                                                   |                                                                |                           | X                        |
| A0177  | 23.20 ± 0.05 | X                            |                                                                   |                                                                |                           | X                        |
| A0179  | 22.55 ± 0.05 | X                            |                                                                   |                                                                |                           |                          |
| A0180  | 22.35 ± 0.05 | X                            |                                                                   |                                                                |                           |                          |
| A0181  | 22.15 ± 0.05 | X                            |                                                                   |                                                                |                           |                          |
| A0182  | 21.85 ± 0.05 | X                            |                                                                   |                                                                |                           |                          |
| A0183  | 21.65 ± 0.05 | X                            |                                                                   |                                                                |                           |                          |
| A0184  | 21.35 ± 0.05 | X                            |                                                                   |                                                                |                           |                          |
| A0185  | 21.15 ± 0.05 | X                            |                                                                   |                                                                |                           |                          |

|       |              |   |  |   |  |  |
|-------|--------------|---|--|---|--|--|
| A0186 | 20.80 ± 0.05 | X |  |   |  |  |
| A0187 | 20.55 ± 0.05 | X |  |   |  |  |
| A0188 | 20.35 ± 0.05 | X |  |   |  |  |
| A0189 | 20.10 ± 0.05 | X |  |   |  |  |
| A0190 | 19.80 ± 0.05 | X |  |   |  |  |
| A0191 | 19.45 ± 0.05 | X |  |   |  |  |
| A0192 | 19.15 ± 0.05 | X |  |   |  |  |
| A0193 | 18.80 ± 0.05 | X |  |   |  |  |
| A0194 | 18.55 ± 0.05 | X |  |   |  |  |
| A0195 | 18.15 ± 0.05 | X |  |   |  |  |
| A0196 | 17.80 ± 0.05 | X |  |   |  |  |
| A0197 | 17.60 ± 0.05 | X |  |   |  |  |
| A0198 | 17.35 ± 0.05 | X |  |   |  |  |
| A0199 | 17.15 ± 0.05 | X |  |   |  |  |
| A0200 | 16.80 ± 0.05 | X |  |   |  |  |
| A0201 | 16.55 ± 0.05 | X |  | X |  |  |
| A0202 | 16.35 ± 0.05 | X |  |   |  |  |
| A0203 | 16.15 ± 0.05 | X |  |   |  |  |
| A0204 | 15.80 ± 0.05 | X |  |   |  |  |
| A0205 | 15.45 ± 0.05 | X |  |   |  |  |
| A0206 | 15.15 ± 0.05 | X |  |   |  |  |
| A0207 | 14.85 ± 0.05 | X |  |   |  |  |
| A0208 | 14.65 ± 0.05 | X |  |   |  |  |
| A0209 | 14.35 ± 0.05 | X |  |   |  |  |
| A0210 | 14.15 ± 0.05 | X |  |   |  |  |
| A0211 | 13.85 ± 0.05 | X |  |   |  |  |
| A0212 | 13.65 ± 0.05 | X |  |   |  |  |
| A0213 | 13.45 ± 0.05 | X |  |   |  |  |
| A0214 | 13.20 ± 0.05 | X |  |   |  |  |
| A0215 | 12.85 ± 0.05 | X |  |   |  |  |
| A0216 | 12.65 ± 0.05 |   |  | X |  |  |
| A0217 | 12.45 ± 0.05 | X |  |   |  |  |
| A0218 | 12.25 ± 0.05 | X |  |   |  |  |
| A0219 | 12.10 ± 0.05 | X |  |   |  |  |
| A0220 | 11.80 ± 0.05 |   |  | X |  |  |
| A0221 | 11.50 ± 0.05 | X |  |   |  |  |
| A0222 | 11.30 ± 0.05 | X |  |   |  |  |
| A0223 | 11.10 ± 0.05 | X |  |   |  |  |
| A0347 | 10.80 ± 0.05 | X |  |   |  |  |
| A0348 | 10.50 ± 0.05 |   |  | X |  |  |
| A0349 | 10.30 ± 0.05 | X |  |   |  |  |
| A0350 | 10.10 ± 0.05 | X |  |   |  |  |
| A0351 | 9.80 ± 0.05  | X |  |   |  |  |
| A0352 | 9.60 ± 0.05  | X |  |   |  |  |

|       |             |   |   |   |   |  |
|-------|-------------|---|---|---|---|--|
| A0353 | 9.40 ± 0.05 | X |   |   |   |  |
| A0354 | 9.20 ± 0.05 |   |   | X |   |  |
| A0355 | 8.75 ± 0.05 | X |   |   |   |  |
| A0356 | 8.55 ± 0.05 | X |   |   |   |  |
| A0357 | 8.35 ± 0.05 | X |   |   |   |  |
| A0358 | 8.15 ± 0.05 | X |   |   |   |  |
| A0359 | 7.80 ± 0.05 | X |   |   |   |  |
| A0360 | 7.60 ± 0.05 |   |   | X |   |  |
| A0361 | 7.40 ± 0.05 | X |   |   |   |  |
| A0362 | 7.15 ± 0.05 | X |   |   |   |  |
| A0363 | 6.85 ± 0.05 | X |   |   |   |  |
| A0364 | 6.65 ± 0.05 | X |   |   |   |  |
| A0365 | 6.45 ± 0.05 |   |   | X | X |  |
| A0366 | 6.25 ± 0.05 | X |   |   |   |  |
| A0367 | 6.10 ± 0.05 | X |   |   |   |  |
| A0368 | 5.81 ± 0.05 | X |   |   |   |  |
| A0369 | 5.65 ± 0.05 | X |   |   |   |  |
| A0370 | 5.45 ± 0.05 |   |   | X | X |  |
| A0371 | 5.25 ± 0.05 | X |   |   |   |  |
| A0372 | 5.10 ± 0.05 | X |   |   |   |  |
| A0373 | 4.80 ± 0.05 | X |   |   |   |  |
| A0374 | 4.60 ± 0.05 | X |   |   |   |  |
| A0375 | 4.45 ± 0.05 |   |   | X | X |  |
| A0376 | 4.25 ± 0.05 |   |   | X | X |  |
| A0377 | 4.10 ± 0.05 | X |   |   |   |  |
| A0378 | 3.75 ± 0.05 | X |   |   |   |  |
| A0379 | 3.45 ± 0.05 |   | X | X | X |  |
| A0380 | 3.15 ± 0.05 | X | X |   |   |  |
| A0381 | 2.85 ± 0.05 | X | X |   |   |  |
| A0382 | 2.55 ± 0.05 | X | X |   |   |  |
| A0383 | 2.35 ± 0.05 | X | X |   |   |  |
| A0384 | 2.15 ± 0.05 | X | X |   |   |  |
| A0385 | 1.80 ± 0.05 | X | X |   |   |  |
| A0386 | 1.50 ± 0.05 | X |   |   |   |  |
| A0387 | 1.25 ± 0.05 | X | X |   |   |  |
| A0388 | 0.75 ± 0.05 | X |   |   |   |  |

**Table S4.** Dose recovery and residual dose results for selected samples from core REM3B measured using the pIR<sub>200</sub>IR<sub>290</sub> protocol. Three aliquots were measured for the dose recovery test, and six each for the residual dose tests.

| Sample | Dose Recovery     |                    |       | Residual Dose           |            |
|--------|-------------------|--------------------|-------|-------------------------|------------|
|        | Applied Dose (Gy) | Measured Dose (Gy) | Ratio | Bleaching Method        | Dose (Gy)  |
| A0375  | 104               | 107 ± 5            | 1.02  | 60 days direct sunlight | 6.75 ± 0.3 |
| A0376  | -                 |                    |       | 300 hours LED lamp      | 32.7 ± 4.0 |

**Table S5.** Summary of depths and averaged  $D_e$  values and test dose sensitivity values for the ten fine-grained (4-11 $\mu$ m) and five very fine sand (63-90  $\mu$ m) quartz OSL samples measured in this study. Three aliquots were measured for each sample, using a measurement protocol involving three regenerative dose steps, preheat/cutheat temperatures of 260/240°C and a test dose of c. 37 Gy. Minimum equivalent doses are assumed to represent signal saturation.

| Sample | Depth (m)    | Grain-Size Fraction ( $\mu$ m) | Averaged $D_e$ (Gy) |
|--------|--------------|--------------------------------|---------------------|
| A0164  | 29.80 ± 0.05 | 4-11                           | No signal           |
| A0166  | 28.85 ± 0.05 |                                | >290                |
| A0167  | 28.45 ± 0.05 |                                | >290                |
| A0168  | 27.75 ± 0.05 |                                | >290                |
| A0171  | 26.35 ± 0.05 |                                | >102                |
| A0172  | 25.30 ± 0.05 |                                | >474                |
| A0174  | 24.25 ± 0.05 |                                | >239                |
| A0175  | 23.65 ± 0.05 |                                | 191 ± 9             |
| A0176  | 23.45 ± 0.05 |                                | 209 ± 18            |
| A0177  | 23.20 ± 0.05 |                                | 78.1 ± 38.6         |
| A0365  | 6.45 ± 0.05  | 63-90                          | 55.1 ± 8.3          |
| A0370  | 5.45 ± 0.05  |                                | 51.0 ± 12.1         |
| A0375  | 4.45 ± 0.05  |                                | 63.5 ± 9.9          |
| A0376  | 4.25 ± 0.05  |                                | 135 ± 94            |
| A0379  | 3.45 ± 0.05  |                                | 50.0 ± 7.0          |

**Table S6.** Summary of depths, number of aliquots measured, measurement protocol and averaged uncorrected  $D_e$  values for the 18 very fine sand (63-90 $\mu$ m) feldspar samples measured in this study using pIR-IR protocols. The  $D_e$  uncertainty is given as the standard error.

| Sample | Depth (m)        | Number of Aliquots Measured | Measurement Protocol                 | Averaged $D_e$ (Gy) $\pm$ se |
|--------|------------------|-----------------------------|--------------------------------------|------------------------------|
| A0201  | 16.60 $\pm$ 0.05 | 6                           | pIR <sub>200</sub> IR <sub>290</sub> | 174 $\pm$ 3                  |
| A0216  | 12.65 $\pm$ 0.05 | 6                           |                                      | 133 $\pm$ 3                  |
| A0220  | 11.80 $\pm$ 0.05 | 6                           |                                      | 114 $\pm$ 3                  |
| A0348  | 10.50 $\pm$ 0.05 | 6                           |                                      | 120 $\pm$ 4                  |
| A0354  | 9.20 $\pm$ 0.05  | 6                           |                                      | 116 $\pm$ 8                  |
| A0360  | 7.60 $\pm$ 0.05  | 6                           |                                      | 117 $\pm$ 3                  |
| A0365  | 6.45 $\pm$ 0.05  | 12                          |                                      | 122 $\pm$ 11                 |
| A0370  | 5.45 $\pm$ 0.05  | 12                          |                                      | 131 $\pm$ 6                  |
| A0375  | 4.45 $\pm$ 0.05  | 12                          |                                      | 112 $\pm$ 4                  |
| A0376  | 4.25 $\pm$ 0.05  | 6                           |                                      | 113 $\pm$ 4                  |
| A0379  | 3.45 $\pm$ 0.05  | 6                           | pIR <sub>200</sub> IR <sub>290</sub> | 113 $\pm$ 4                  |
|        |                  | 24                          | pIR <sub>50</sub> IR <sub>290</sub>  | 85.8 $\pm$ 1.0               |
| A0380  | 3.45 $\pm$ 0.05  | 24                          | pIR <sub>50</sub> IR <sub>290</sub>  | 77.0 $\pm$ 1.5               |
| A0381  | 3.15 $\pm$ 0.05  | 24                          |                                      | 81.7 $\pm$ 3.4               |
| A0382  | 2.85 $\pm$ 0.05  | 24                          |                                      | 87.8 $\pm$ 2.6               |
| A0383  | 2.55 $\pm$ 0.05  | 24                          |                                      | 87.7 $\pm$ 1.1               |
| A0384  | 2.15 $\pm$ 0.05  | 24                          |                                      | 84.1 $\pm$ 4.1               |
| A0385  | 1.80 $\pm$ 0.05  | 24                          |                                      | 83.4 $\pm$ 1.8               |
| A0387  | 1.25 $\pm$ 0.05  | 24                          |                                      | 77.5 $\pm$ 0.9               |

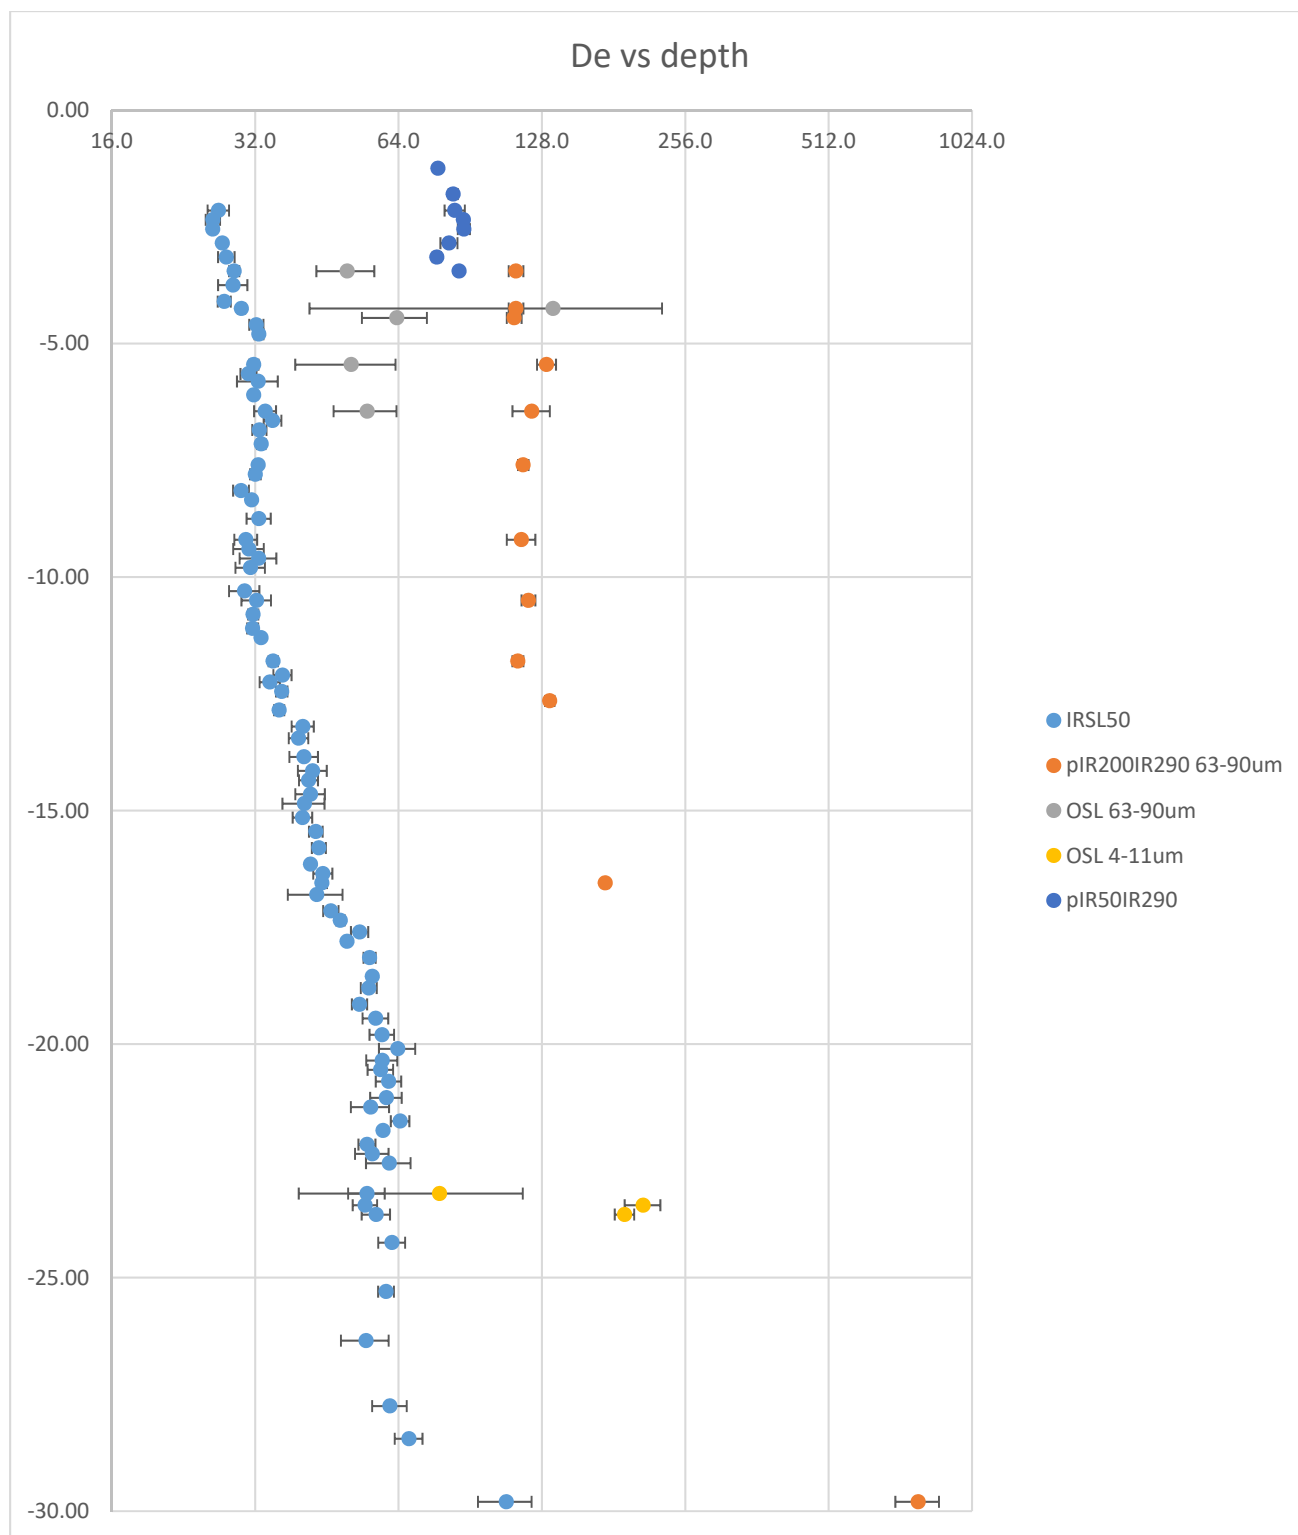

**Figure S3.** Differences in equivalent dose vs. depth for the different mineral and grain size fractions down the REM3B core, using pIR-IRSL equivalent dose values *uncorrected* for residual dose. The IRSL50 results are based on bulk, unprocessed sample.



## Sensitivity measurements

**Table S7.** Summary of depths, averaged  $D_e$  values and test dose sensitivity values for the bulk IRSL<sub>50</sub> measurements from the REM3B core. Three aliquots were measured for each sample, applying a test dose of c. 37 Gy following measurement of the natural IRSL signal at 50°C. Equivalent dose is given as the mean of the accepted aliquots.

| Sample | Depth (m)        | Approximate $D_e$ (Gy) | Sensitivity (cts/s/Gy) $\pm 1\sigma$ |
|--------|------------------|------------------------|--------------------------------------|
| A0171  | 26.35 $\pm$ 0.05 | 108                    | 2980 $\pm$ 1513                      |
| A0174  | 24.25 $\pm$ 0.05 | 67                     | 1259 $\pm$ 1027                      |
| A0175  | 23.65 $\pm$ 0.05 | 61                     | 3088 $\pm$ 2115                      |
| A0176  | 23.45 $\pm$ 0.05 | 55                     | 4855 $\pm$ 562                       |
| A0177  | 23.20 $\pm$ 0.05 | 60                     | 6411 $\pm$ 3140                      |
| A0179  | 22.55 $\pm$ 0.05 | 62                     | 5769 $\pm$ 2067                      |
| A0180  | 22.35 $\pm$ 0.05 | 57                     | 6285 $\pm$ 1133                      |
| A0181  | 22.15 $\pm$ 0.05 | 54                     | 10016 $\pm$ 3149                     |
| A0182  | 21.85 $\pm$ 0.05 | 55                     | 9768 $\pm$ 2240                      |
| A0183  | 21.65 $\pm$ 0.05 | 61                     | 6512 $\pm$ 1368                      |
| A0184  | 21.35 $\pm$ 0.05 | 56                     | 4339 $\pm$ 3224                      |
| A0185  | 21.15 $\pm$ 0.05 | 55                     | 6414 $\pm$ 1583                      |
| A0186  | 20.80 $\pm$ 0.05 | 59                     | 5892 $\pm$ 1191                      |
| A0187  | 20.55 $\pm$ 0.05 | 65                     | 5473 $\pm$ 985                       |
| A0188  | 20.35 $\pm$ 0.05 | 56                     | 6189 $\pm$ 2591                      |
| A0189  | 20.10 $\pm$ 0.05 | 60                     | 6577 $\pm$ 465                       |
| A0190  | 19.80 $\pm$ 0.05 | 61                     | 6901 $\pm$ 1349                      |
| A0191  | 19.45 $\pm$ 0.05 | 59                     | 5811 $\pm$ 1405                      |
| A0192  | 19.15 $\pm$ 0.05 | 59                     | 3574 $\pm$ 972                       |
| A0193  | 18.80 $\pm$ 0.05 | 64                     | 4632 $\pm$ 2671                      |
| A0194  | 18.55 $\pm$ 0.05 | 59                     | 5932 $\pm$ 2793                      |
| A0195  | 18.15 $\pm$ 0.05 | 57                     | 3871 $\pm$ 2123                      |
| A0196  | 17.80 $\pm$ 0.05 | 53                     | 5014 $\pm$ 1927                      |
| A0197  | 17.60 $\pm$ 0.05 | 55                     | 3988 $\pm$ 1972                      |
| A0198  | 17.35 $\pm$ 0.05 | 56                     | 4087 $\pm$ 130                       |
| A0199  | 17.15 $\pm$ 0.05 | 56                     | 4612 $\pm$ 496                       |
| A0200  | 16.80 $\pm$ 0.05 | 50                     | 5673 $\pm$ 1201                      |
| A0201  | 16.55 $\pm$ 0.05 | 53                     | 7767 $\pm$ 676                       |
| A0202  | 16.35 $\pm$ 0.05 | 48                     | 4067 $\pm$ 10                        |
| A0203  | 16.15 $\pm$ 0.05 | 46                     | 4411 $\pm$ 4525                      |
| A0204  | 15.80 $\pm$ 0.05 | 43                     | 4252 $\pm$ 1835                      |
| A0205  | 15.45 $\pm$ 0.05 | 44                     | 4984 $\pm$ 1475                      |
| A0206  | 15.15 $\pm$ 0.05 | 44                     | 6868 $\pm$ 2365                      |
| A0207  | 14.85 $\pm$ 0.05 | 42                     | 10013 $\pm$ 2312                     |
| A0208  | 14.65 $\pm$ 0.05 | 44                     | 12048 $\pm$ 2868                     |
| A0209  | 14.35 $\pm$ 0.05 | 43                     | 10922 $\pm$ 526                      |
| A0210  | 14.15 $\pm$ 0.05 | 40                     | 7022 $\pm$ 2306                      |

|       |              |    |              |
|-------|--------------|----|--------------|
| A0211 | 13.85 ± 0.05 | 41 | 5656 ± 2103  |
| A0212 | 13.65 ± 0.05 | 42 | 4356 ± 825   |
| A0213 | 13.45 ± 0.05 | 41 | 5881 ± 1798  |
| A0214 | 13.20 ± 0.05 | 42 | 3795 ± 2393  |
| A0215 | 12.85 ± 0.05 | 41 | 2859 ± 1380  |
| A0217 | 12.45 ± 0.05 | 40 | 4004 ± 99    |
| A0218 | 12.25 ± 0.05 | 40 | 6024 ± 1844  |
| A0219 | 12.10 ± 0.05 | 36 | 9457 ± 4669  |
| A0221 | 11.50 ± 0.05 | 36 | 7505 ± 674   |
| A0222 | 11.30 ± 0.05 | 34 | 10127 ± 5499 |
| A0223 | 11.10 ± 0.05 | 37 | 6342 ± 1475  |
| A0347 | 10.80 ± 0.05 | 35 | 8559 ± 4055  |
| A0349 | 10.30 ± 0.05 | 33 | 8615 ± 2753  |
| A0350 | 10.10 ± 0.05 | 32 | 7136 ± 5420  |
| A0351 | 9.80 ± 0.05  | 32 | 7380 ± 3412  |
| A0352 | 9.60 ± 0.05  | 32 | 7048 ± 1114  |
| A0353 | 9.40 ± 0.05  | 30 | 7890 ± 3359  |
| A0355 | 8.75 ± 0.05  | 31 | 6132 ± 1365  |
| A0356 | 8.55 ± 0.05  | 33 | 7086 ± 507   |
| A0357 | 8.35 ± 0.05  | 31 | 6025 ± 2173  |
| A0358 | 8.15 ± 0.05  | 31 | 7388 ± 982   |
| A0359 | 7.80 ± 0.05  | 33 | 7378 ± 2956  |
| A0361 | 7.40 ± 0.05  | 31 | 10536 ± 3801 |
| A0362 | 7.15 ± 0.05  | 30 | 12860 ± 1520 |
| A0363 | 6.85 ± 0.05  | 32 | 14730 ± 5158 |
| A0364 | 6.65 ± 0.05  | 32 | 11213 ± 3898 |
| A0366 | 6.25 ± 0.05  | 33 | 9223 ± 2026  |
| A0367 | 6.10 ± 0.05  | 33 | 10675 ± 483  |
| A0368 | 5.81 ± 0.05  | 35 | 10879 ± 2010 |
| A0369 | 5.65 ± 0.05  | 34 | 11195 ± 3145 |
| A0371 | 5.25 ± 0.05  | 32 | 20821 ± 3144 |
| A0372 | 5.10 ± 0.05  | 33 | 23798 ± 4648 |
| A0373 | 4.80 ± 0.05  | 31 | 19008 ± 4645 |
| A0374 | 4.60 ± 0.05  | 32 | 22835 ± 650  |
| A0377 | 4.10 ± 0.05  | 33 | 21749 ± 2602 |
| A0378 | 3.75 ± 0.05  | 32 | 29515 ± 3227 |
| A0380 | 3.15 ± 0.05  | 30 | 4946 ± 1244  |
| A0381 | 2.85 ± 0.05  | 28 | 6511 ± 2459  |
| A0382 | 2.55 ± 0.05  | 29 | 7640 ± 3245  |
| A0383 | 2.35 ± 0.05  | 29 | 4509 ± 404   |
| A0384 | 2.15 ± 0.05  | 28 | 5855 ± 1399  |
| A0385 | 1.80 ± 0.05  | 27 | 6400 ± 431   |
| A0386 | 1.50 ± 0.05  | 26 | 6982 ± 2741  |
| A0387 | 1.25 ± 0.05  | 26 | 9499 ± 2552  |

|       |                 |    |                 |
|-------|-----------------|----|-----------------|
| A0388 | $0.75 \pm 0.05$ | 27 | $8169 \pm 2899$ |
|-------|-----------------|----|-----------------|

**Table S8.** Summary of depths, average and standard deviation of test dose sensitivity values for the different mineral and grain-size fractions measured for profile RP1.

| Sample   | Depth from Surface<br>(m) | Sensitivity (cts/s/Gy) $\pm 1\sigma$ |                             |                                |
|----------|---------------------------|--------------------------------------|-----------------------------|--------------------------------|
|          |                           | 100-200 $\mu\text{m}$ Quartz         | 63-100 $\mu\text{m}$ Quartz | 4-11 $\mu\text{m}$ Polymineral |
| MAL10349 | $3.50 \pm 0.05$           | -                                    | $87.8 \pm 83.6$             | $756 \pm 67.2$                 |
| MAL10348 | $4.25 \pm 0.05$           | $102 \pm 103$                        | $76.6 \pm 45.8$             | $549 \pm 44.7$                 |
| MAL10347 | $4.95 \pm 0.05$           | $84.4 \pm 55.2$                      | $98.3 \pm 71.7$             | $514 \pm 35$                   |
| MAL10346 | $6.35 \pm 0.05$           | $77.47 \pm 117$                      | $65.3 \pm 37.5$             | $713 \pm 55$                   |

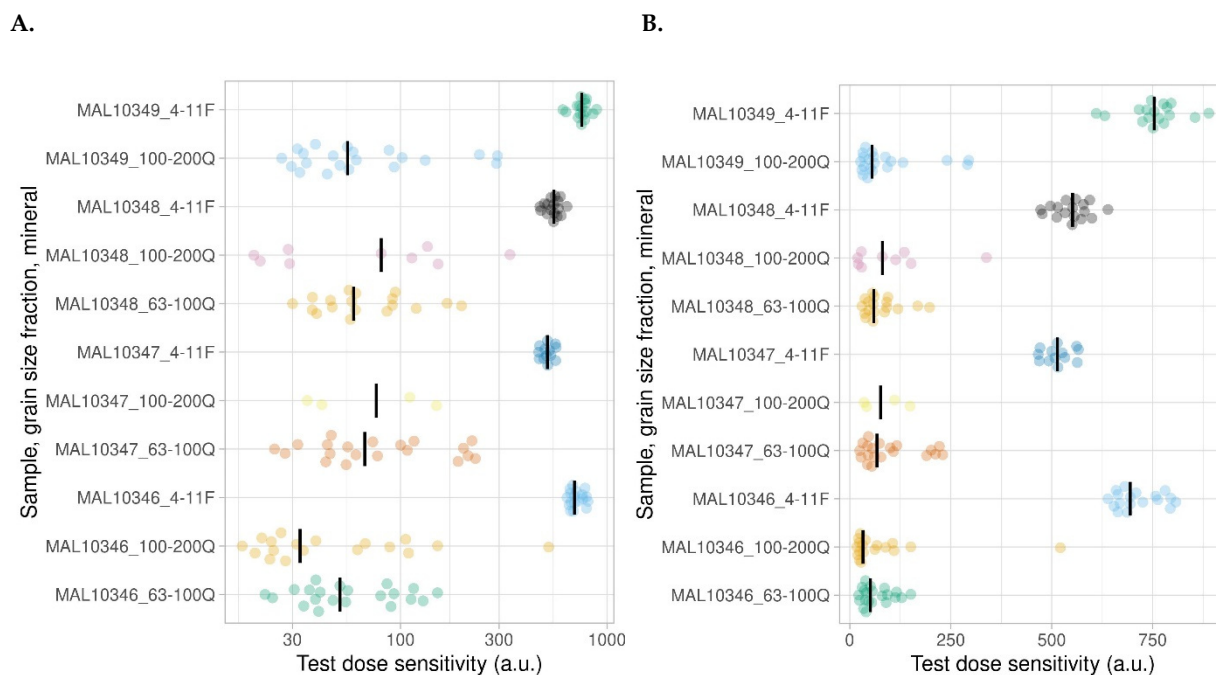

**Figure S4.** Test dose sensitivity for the different mineral and grain-size samples measured for profile RP1, expressed as dot plots. The median of each set of values is marked by a black line. A logarithmic scale in (A) highlights differences between the quartz sensitivities, and a linear scale in (B) highlights differences between the polymineral fine-grained sensitivities.

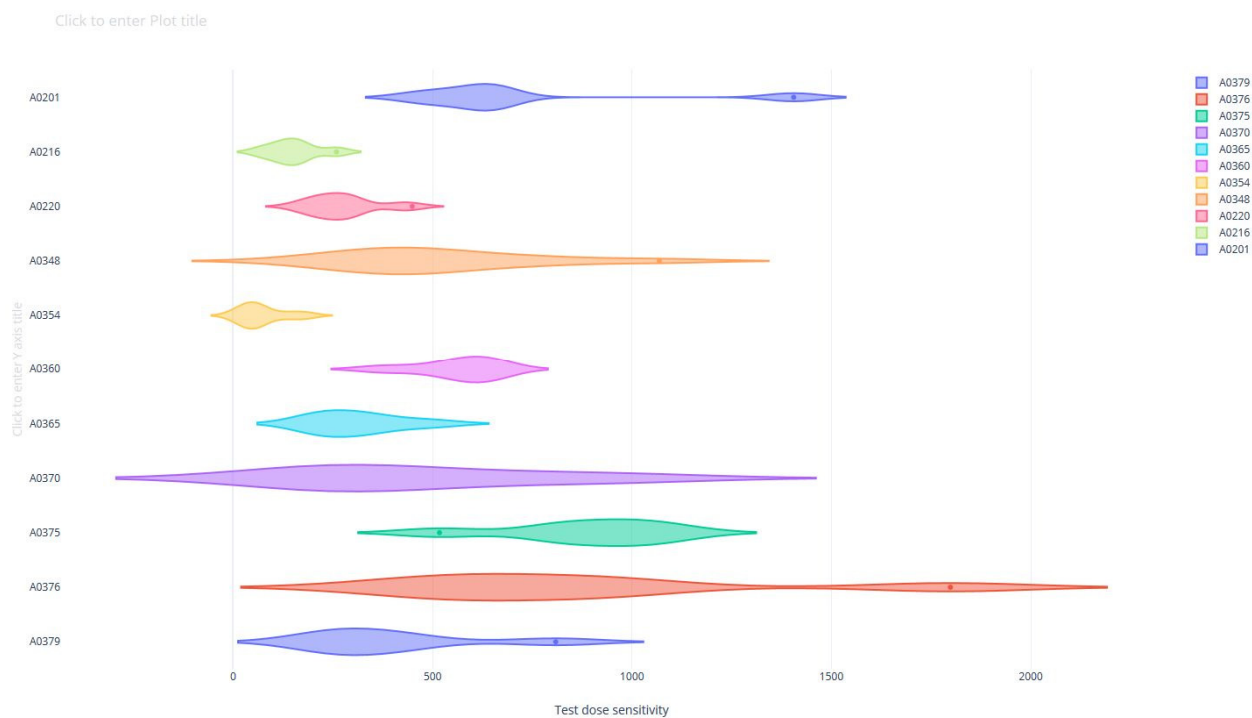

**Figure S5.** Test dose sensitivity for the very fine sand (63-90  $\mu\text{m}$ ) K-feldspar samples measured from RP1 in this study expressed as violin plot distributions.

A

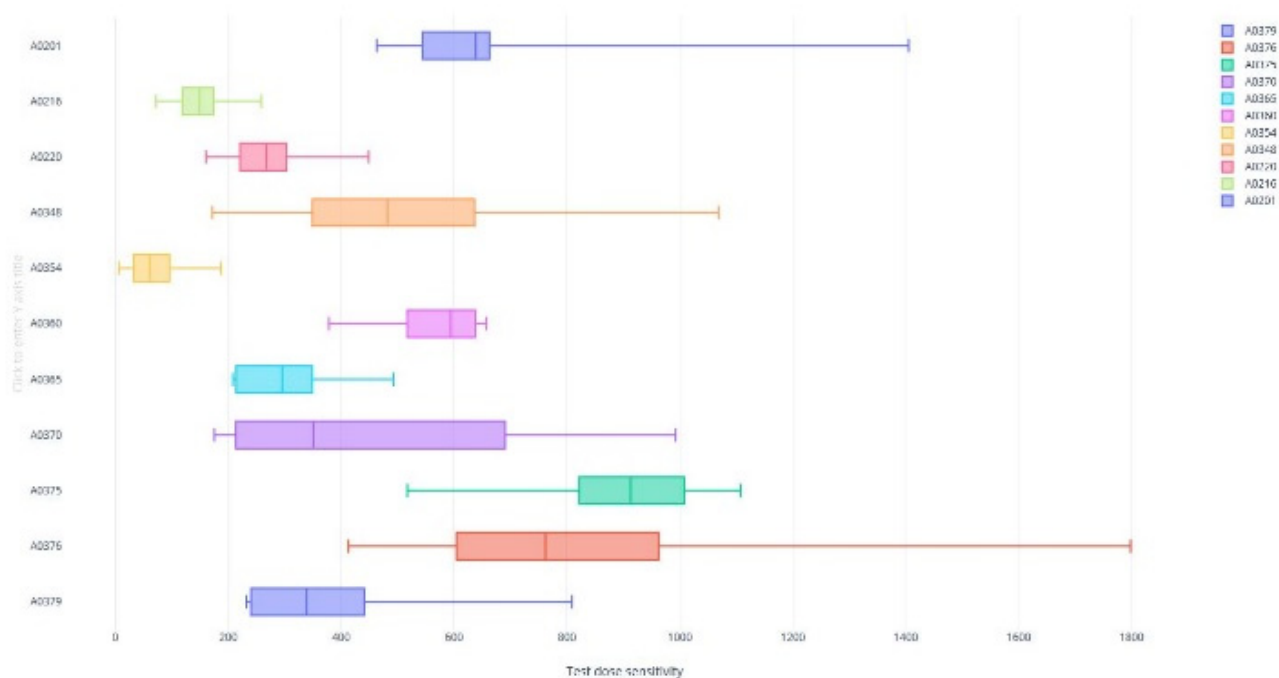

B

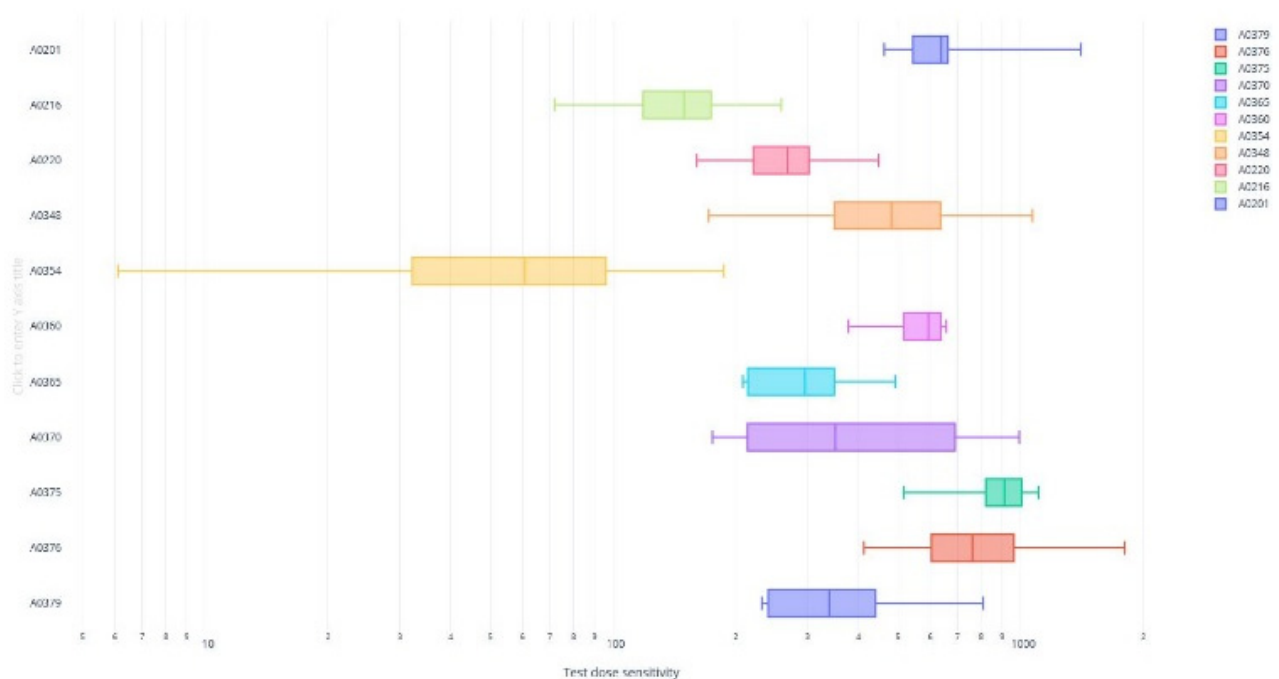

**Figure S6.** Test dose sensitivity for the very fine sand (63-90  $\mu\text{m}$ ) K-feldspar samples measured from RP1 in this study expressed as box plots with A) linear and B) logarithmic scale on the x-axis.

**A**

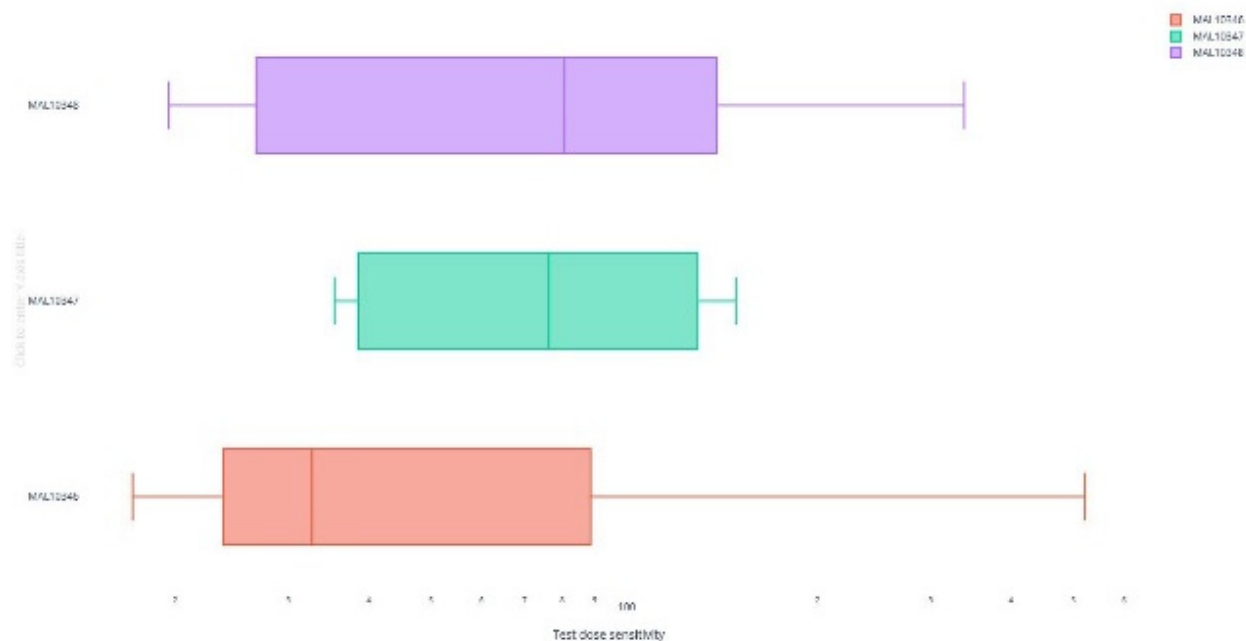

**B**

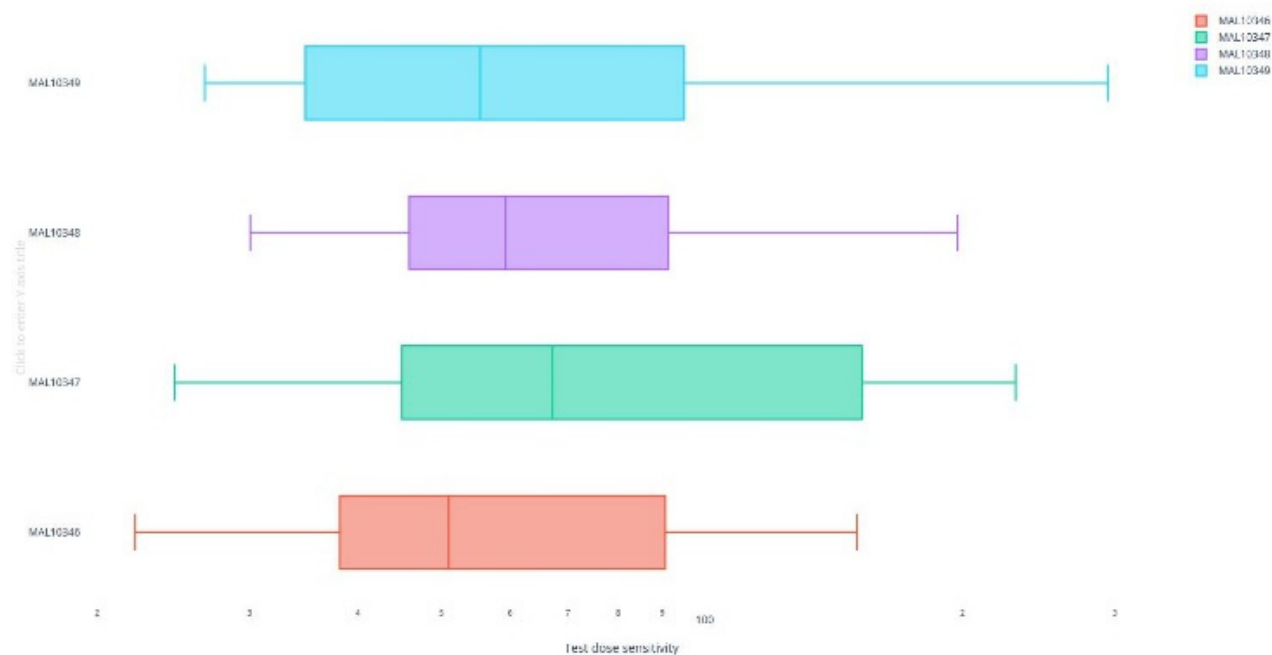

**Figure S7.** Box-plots of test-dose sensitivity for the A) 100-200 µm and B) 63-100 µm quartz fraction of samples measured from profile RP1, using a logarithmic scale.

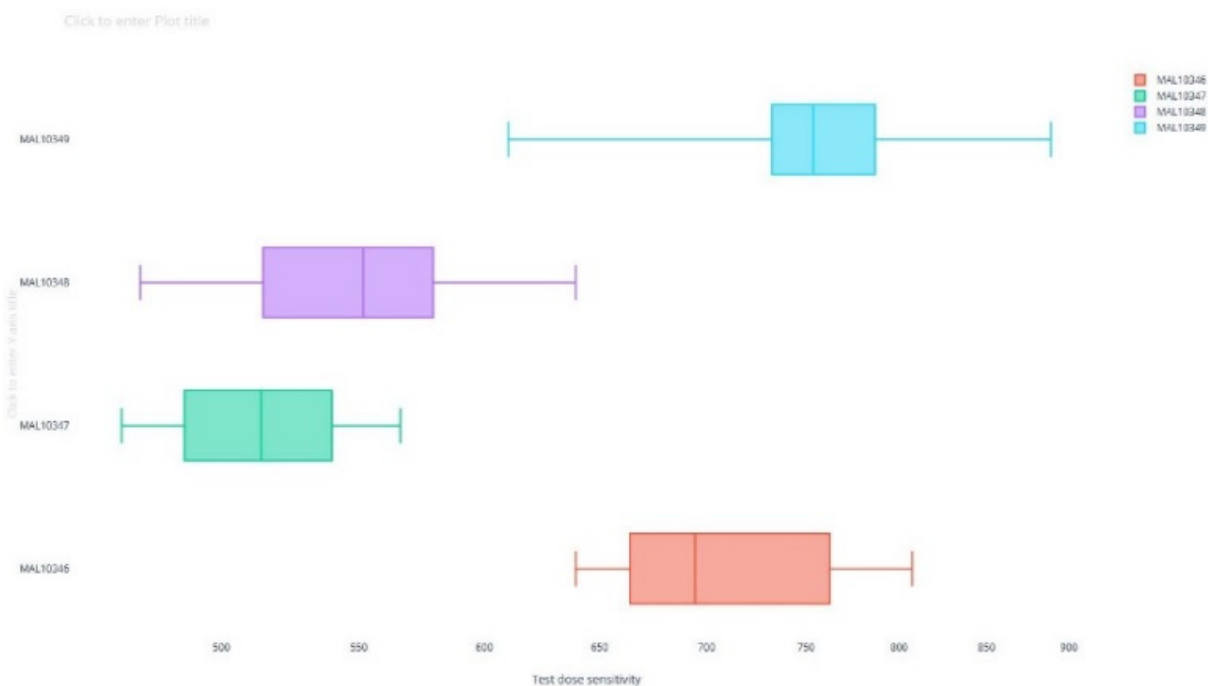

**Figure S8.** Box-plots of test-dose sensitivity for the 4-11  $\mu\text{m}$  polymineral fraction of samples measured from profile RP1, using a logarithmic scale.

**Table S9.** Summary of depths, averaged  $D_e$  values and test dose sensitivity values for the ten fine-grained (4-11 $\mu\text{m}$ ) quartz OSL samples measured in this study. Three aliquots were measured for each sample, using a measurement protocol involving three regenerative dose steps, preheat/cutheat temperatures of 260/240°C and a test dose of c. 37 Gy. Minimum equivalent doses are assumed to represent signal saturation.

| Sample | Depth (m)        | Averaged $D_e$ (Gy) | Sensitivity (cts/s/Gy) $\pm 1\sigma$ |
|--------|------------------|---------------------|--------------------------------------|
| A0164  | 29.80 $\pm$ 0.05 | No signal           | 26.9 $\pm$ 11.4                      |
| A0166  | 28.85 $\pm$ 0.05 | >290                | 222 $\pm$ 75                         |
| A0167  | 28.45 $\pm$ 0.05 | >290                | 646 $\pm$ 456                        |
| A0168  | 27.75 $\pm$ 0.05 | >290                | 460 $\pm$ 27                         |
| A0171  | 26.35 $\pm$ 0.05 | >102                | 405 $\pm$ 69                         |
| A0172  | 25.30 $\pm$ 0.05 | >474                | 1698 $\pm$ 672                       |
| A0174  | 24.25 $\pm$ 0.05 | >239                | 859 $\pm$ 139                        |
| A0175  | 23.65 $\pm$ 0.05 | 191 $\pm$ 9         | 1321 $\pm$ 239                       |
| A0176  | 23.45 $\pm$ 0.05 | 209 $\pm$ 18        | 719 $\pm$ 88                         |
| A0177  | 23.20 $\pm$ 0.05 | 78.1 $\pm$ 38.6     | 1621 $\pm$ 2613                      |

**Table S10.** Summary of depths, averaged  $D_e$  values and test dose sensitivity values for the five very fine sand (63-90  $\mu\text{m}$ ) quartz OSL samples measured in this study. Three aliquots were measured for each sample, using a measurement protocol involving two regenerative dose steps, preheat/cutheat temperatures of 260/240°C and a test dose of c. 37 Gy.

| Sample | Depth (m)       | Averaged $D_e$ (Gy) | Sensitivity (cts/s/Gy) $\pm 1\sigma$ |
|--------|-----------------|---------------------|--------------------------------------|
| A0365  | 6.45 $\pm$ 0.05 | 55.1 $\pm$ 8.3      | 86.2 $\pm$ 15.9                      |
| A0370  | 5.45 $\pm$ 0.05 | 51.0 $\pm$ 12.1     | 221 $\pm$ 84                         |
| A0375  | 4.45 $\pm$ 0.05 | 63.5 $\pm$ 9.9      | 195 $\pm$ 153                        |
| A0376  | 4.25 $\pm$ 0.05 | 135 $\pm$ 94        | 573 $\pm$ 132                        |
| A0379  | 3.45 $\pm$ 0.05 | 50.0 $\pm$ 7.0      | 275 $\pm$ 214                        |

**Table S11.** Summary of depths, averaged uncorrected  $D_e$  values and test dose sensitivity values for the 11 very fine sand (63-90 $\mu\text{m}$ ) K-feldspar samples measured in this study using the pIR-IR protocols. The number of aliquots measured for each sample is listed and the  $D_e$  uncertainty is given as the standard error.

| Sample | Depth (m)        | Number of Aliquots Measured | Measurement Protocol                 | Averaged $D_e$ (Gy) $\pm$ se | Sensitivity (cts/s/Gy) $\pm 1\sigma$ |
|--------|------------------|-----------------------------|--------------------------------------|------------------------------|--------------------------------------|
| A0201  | 16.60 $\pm$ 0.05 | 6                           | pIR <sub>200</sub> IR <sub>290</sub> | 174 $\pm$ 3                  | 400 $\pm$ 216                        |
| A0216  | 12.65 $\pm$ 0.05 | 6                           |                                      | 133 $\pm$ 3                  | 884 $\pm$ 492                        |
| A0220  | 11.80 $\pm$ 0.05 | 6                           |                                      | 114 $\pm$ 3                  | 880 $\pm$ 208                        |
| A0348  | 10.50 $\pm$ 0.05 | 6                           |                                      | 120 $\pm$ 4                  | 462 $\pm$ 317                        |
| A0354  | 9.20 $\pm$ 0.05  | 6                           |                                      | 116 $\pm$ 8                  | 309 $\pm$ 107                        |
| A0360  | 7.60 $\pm$ 0.05  | 6                           |                                      | 117 $\pm$ 3                  | 563 $\pm$ 103                        |
| A0365  | 6.45 $\pm$ 0.05  | 12                          |                                      | 122 $\pm$ 11                 | 72.7 $\pm$ 56.4                      |
| A0370  | 5.45 $\pm$ 0.05  | 12                          |                                      | 131 $\pm$ 6                  | 512 $\pm$ 248                        |
| A0375  | 4.45 $\pm$ 0.05  | 12                          |                                      | 112 $\pm$ 4                  | 277 $\pm$ 85                         |
| A0376  | 4.25 $\pm$ 0.05  | 6                           |                                      | 113 $\pm$ 4                  | 726 $\pm$ 154                        |
| A0379  | 3.45 $\pm$ 0.05  | 6                           | pIR <sub>200</sub> IR <sub>290</sub> | 113 $\pm$ 4                  | 168 $\pm$ 63                         |
|        |                  | 24                          | pIR <sub>50</sub> IR <sub>290</sub>  | 85.8 $\pm$ 1.0               | 4762 $\pm$ 2501                      |
| A0380  | 3.45 $\pm$ 0.05  | 24                          | pIR <sub>50</sub> IR <sub>290</sub>  | 77.0 $\pm$ 1.5               | 2243 $\pm$ 1533                      |
| A0381  | 3.15 $\pm$ 0.05  | 24                          |                                      | 81.7 $\pm$ 3.4               | 780 $\pm$ 426                        |
| A0382  | 2.85 $\pm$ 0.05  | 24                          |                                      | 87.8 $\pm$ 2.6               | 9478 $\pm$ 4034                      |
| A0383  | 2.55 $\pm$ 0.05  | 24                          |                                      | 87.7 $\pm$ 1.1               | 11098 $\pm$ 5365                     |
| A0384  | 2.15 $\pm$ 0.05  | 24                          |                                      | 84.1 $\pm$ 4.1               | 4939 $\pm$ 7907                      |
| A0385  | 1.80 $\pm$ 0.05  | 24                          |                                      | 83.4 $\pm$ 1.8               | 5662 $\pm$ 2908                      |
| A0387  | 1.25 $\pm$ 0.05  | 24                          |                                      | 77.5 $\pm$ 0.9               | 3876 $\pm$ 2000                      |

### Statistical analysis of bulk IRSL<sub>50</sub> luminescence sensitivity measurements

We used RStudio 2021.09.0 to statistically analyse the relationship of bulk IRSL<sub>50</sub> luminescence sensitivity with the following variables:

- stratigraphy, i.e., palaeosol vs. (reworked) loess



- OIS
- depth
- clay
- Si/Al

Please refer to the spreadsheet provided in the supplementary material section for the full dataset. Due to the sensitivity data not being normally distributed, we used non-parametric tests to assess the relationship of sensitivity with the listed parameters (Table S12). All tests yielded p-values  $< 0.05$ , suggesting that the difference between sensitivities in loess and palaeosol samples as well as in samples from different OIS is statistically significant, and that there is a statistically significant correlation between sensitivity and depth, sensitivity and clay, and sensitivity and Si/Al. The resulting rho-values show a strong positive correlation between Si/Al and sensitivity, a strong negative correlation between clay and sensitivity, and a strong positive correlation between depth and sensitivity (cf. Table S12).

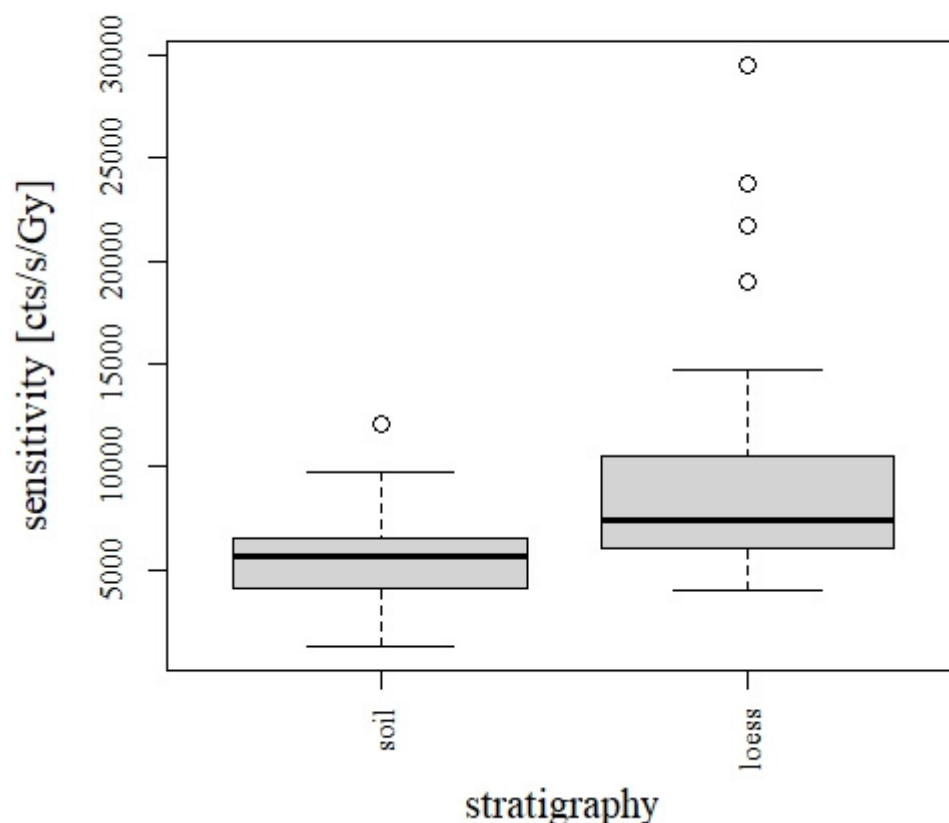

**Figure S9.** IR<sub>50</sub> sensitivity vs. stratigraphy, as divided between soils and loess (including reworked loess).

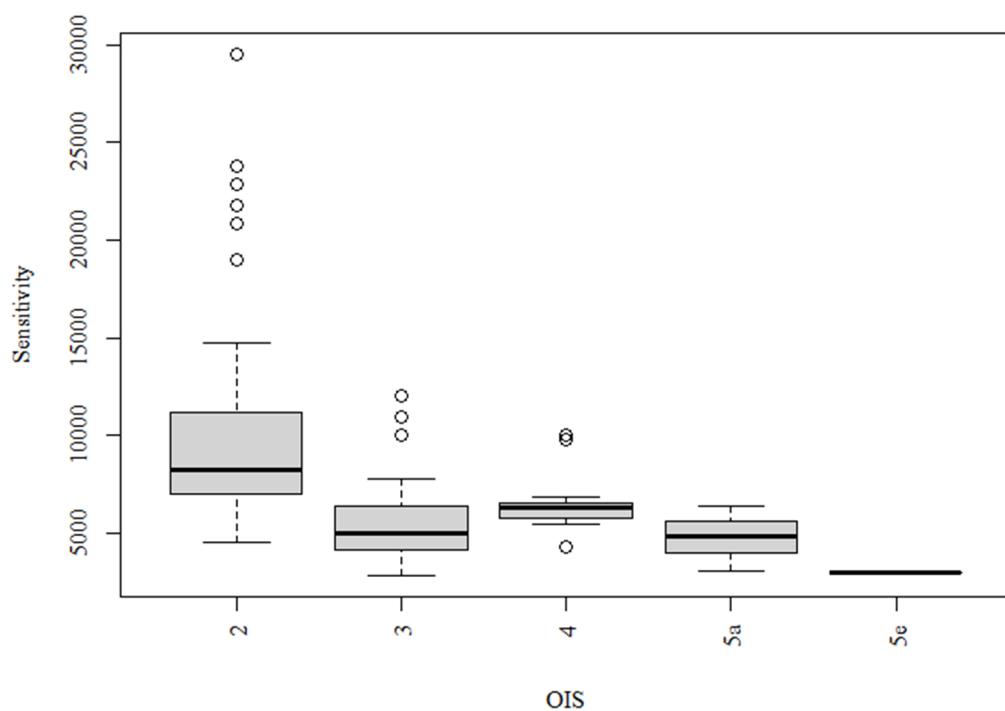

**Figure S10.** IR<sub>50</sub> sensitivity vs. OIS as defined in [53].

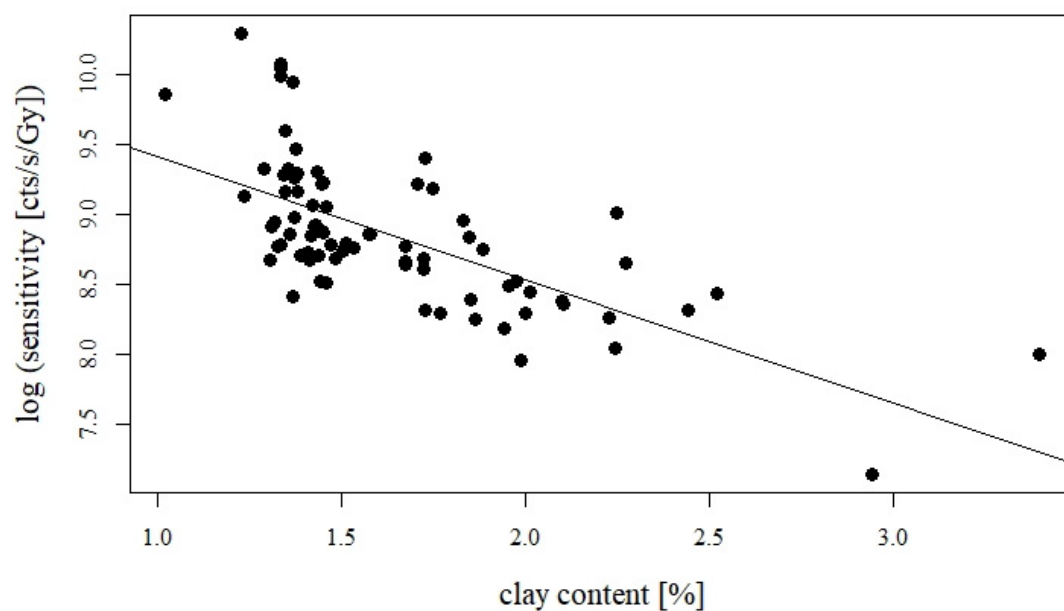

**Figure S11.** Log-transformed IR<sub>50</sub> sensitivity plotted against clay content (data from [53]).

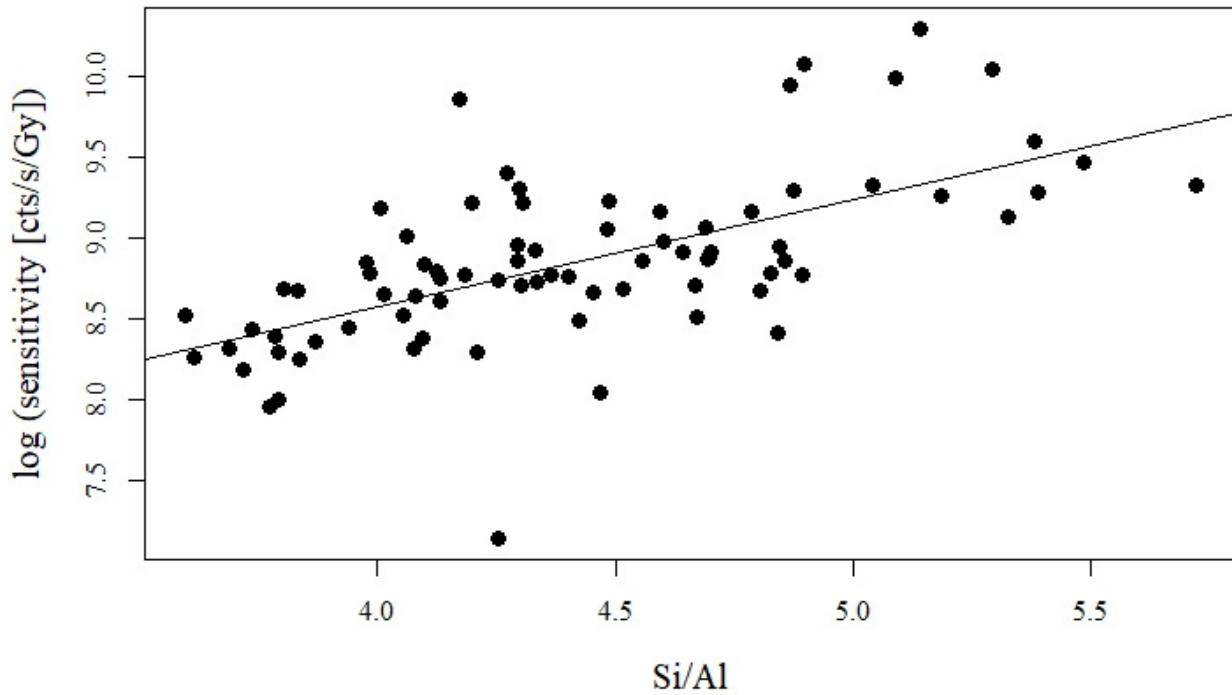

**Figure S12.** Log-transformed  $IR_{50}$  sensitivity plotted against Si/Al (data from [88]).

**Table S12.** Settings and results of the statistical analyses testing the relationship of sensitivity with stratigraphy, OIS, depth, clay, and Si/Al ratio.

| Parameters Tested            | Test Used                       | p-Value   | Correlation Coefficient (rho) |
|------------------------------|---------------------------------|-----------|-------------------------------|
| Stratigraphy vs. sensitivity | Wilcoxon rank sum exact test    | 9.54e-05  | -                             |
| OIS vs. sensitivity          | Kruskal-Wallis rank sum test    | 1.163e-06 | -                             |
| Depth vs. sensitivity        | Spearman's rank correlation rho | 2.539e-07 | 0.5329829                     |
| Clay vs. sensitivity         | Spearman's rank correlation rho | 1.693e-12 | -0.6916748                    |
| Si/Al vs. sensitivity        | Spearman's rank correlation rho | 1.997e-11 | 0.6666261                     |

In order to further assess the relationship of stratigraphy, OIS, depth, clay, and Si/Al with sensitivity we performed multiple linear regression analyses, taking all potential explanatory variables into account. After a visual inspection of the graphs plotting sensitivity against depth, clay, and Si/Al we decided to conduct a log transformation on the sensitivity data before the regression analyses. Please note that the data do not meet all conditions that are usually assumed for a multiple linear regression analysis; the variables may be autocorrelated. Multivariate normality is not given for all variables.

We conducted both a forward selection multiple regression and a backward elimination multiple regression aiming to identify which variables (stratigraphy, OIS, depth, clay, Si/Al) were the best predictors for sensitivity. Both analyses yielded that the best regression model for sensitivity uses only clay and Si/Al as predictors; all

other variables did not improve the model's fit. The model created by forward selection uses Si/Al as the main predictor and clay as the secondary predictor while the backward elimination model suggests that clay is the main predictor and Si/Al is the secondary predictor.
